# Supplementary material for: Bridging the Gap: Exploring Barriers and Opportunities for Students to Facilitate Advocacy Integration in Canadian Medical Education
Source: Research Square preprint supplement (doi:10.21203/rs.3.rs-8327095/v1), 2025-12-29
Supplement: Supplementary file 1 [file 83b681668b1b8c0ec7b6eeb2.docx]

## Appendix A: Literature search strategy

Medical Students – Advocacy

Final

2025 Feb 11

MEDLINE

Database: Ovid MEDLINE(R) ALL <1946 to February 11, 2025>

Search Strategy:

--------------------------------------------------------------------------------

1 Consumer Advocacy/ (3503)

2 Patient Advocacy/ (24406)

3 (advocac* or advocat*).ti,kw,kf. (11146)

4 ((health* or legislat* or medical or patient? or physician* or policy or policies or political* or public) adj3 (advocac* or advocat*)).tw,kw,kf. (19243)

5 ombuds*.ti,kw,kf. (364)

6 or/1-5 [**ADVOCACY - PT 1**] (49883)

7 *Politics/ and (debat* or engag* or influen* or inform or informed or informing or informs or leverag* or participat* or reform* or shap*).ti. (2222)

8 Lobbying/ (4474)

9 Political Activism/ (349)

10 Stakeholder Participation/ (2695)

11 (activis* or lobby*).ti,kw,kf. (3142)

12 ((legisati* or politic* or policy or policies) adj3 (advanc* or debat* or engag* or influen* or inform or informed or informing or informs or interest* or involv* or leverag* or participat* or reform* or shap*)).ti,kw,kf. (5282)

13 (politici#ation? or politici#ed or politici#es or politici#ing).ti,kw,kf. (292)

14 (stakeholder* adj3 (advanc* or debat* or engag* or influen* or inform or informed or informing or informs or interest* or involv* or leverag* or participat* or reform* or shap*)).ti,kw,kf. (2067)

15 or/7-14 [**ADVOCACY, PT 2**] (18538)

16 Health Care Reform/ and (debat* or engag* or influen* or inform or informed or informing or informs or leverag* or participat* or shap*).ti. (832)

17 Health Policy/ and (debat* or engag* or influen* or inform or informed or informing or informs or leverag* or participat* or reform* or shap*).ti. (5402)

18 Public Policy/ and (debat* or engag* or influen* or inform or informed or informing or informs or leverag* or participat* or reform* or shap*).ti. (1569)

19 or/16-18 [**ADVOCACY, PT 3**] (7576)

20 6 or 15 or 19 [**ADVOCACY, PTS 1-3**] (72310)

21 Curriculum/ (92382)

22 exp Education, Medical/ (193060)

23 Models, Educational/ (10677)

24 Students, Medical/ (47761)

25 curricul*.ti,kw,kf. (28291)

26 (medical adj3 (educat* or instruct* or school* or student? or teach* or train*)).ti,kw,kf. (98330)

27 ((educational or instructional) adj model?).ti,kw,kf. (401)

28 (fellow or fellows or fellowship or intern or interns or internship? or residenc*).ti,kw,kf. (39643)

29 ((hospital or medical or physician) adj resident?).ti,kw,kf. (1060)

30 or/21-29 [**MEDICAL EDUCATION**] (331872)

31 20 and 30 [**ADVOCACY - MEDICAL EDUCATION - Pt 1**] (2222)

32 (advoca* adj5 (medical adj3 (curricul* or educat* or instruct* or school* or student? or teach* or train*))).tw,kw,kf. [**ADVOCACY - MEDICAL EDUCATION - Pt 2**] (405)

33 31 or 32 [**ADVOCACY - MEDICAL EDUCATION - PTS 1 & 2**] (2407)

34 limit 33 to yr="2015-current" (1258) [**DATE LIMIT APPLIED**]

35 remove duplicates from 34 (1254) [**INTERNAL DUPLICATES REMOVED**]

***************************
